# Supplementary material
Source: ML conference proceedings conference paper supplement (https://proceedings.mlr.press/v161/nanfack21a.html)
Supplement: Supplementary file [file nanfack21a-supp.pdf]

---

# Global Explanations with Decision Rules: a Co-learning Approach (supplementary material)

---

G eraldin Nanfack<sup>1</sup>

Paul Temple<sup>1</sup>

Beno t Fr enay<sup>1</sup>

<sup>1</sup>PRECISE Research Center , Namur Digital Institute (NADI), University of Namur, Belgium ,

## A GRADIENT OF THE EXPECTED LOG-LIKELIHOOD

This section reports the gradient of the expected log-likelihood of STruGMA w.r.t. its parameters  $\beta$ .

We remind that when omitting class conditioning  $c$ , the expected log-likelihood is:

$$Q(\beta, \beta^t) = \sum_n \sum_k r_{nk} \log \pi_k + \sum_n \sum_k r_{nk} \left[ \log \mathcal{N}(\mathbf{x}_n; \boldsymbol{\mu}_k, \boldsymbol{\Sigma}_k) + \sum_d \log \sigma_\eta (x_{nd} - \alpha_{kd}^{(1)}) + \log (1 - \sigma_\eta (x_{nd} - \alpha_{kd}^{(2)})) \right] - \sum_n \sum_k r_{nk} \log \int_{\alpha_k^{(1)}}^{\alpha_k^{(2)}} \mathcal{N}(\mathbf{x}; \boldsymbol{\mu}_k, \boldsymbol{\Sigma}_k) d\mathbf{x}.$$

We consider the case where  $\boldsymbol{\Sigma}_k$  is diagonal i.e.  $\boldsymbol{\Sigma}_k = \begin{bmatrix} \sigma_{k1}^2 & & \\ & \ddots & \\ & & \sigma_{kd}^2 \end{bmatrix}$ . To avoid any confusion, the  $\sigma_{kd}$  are different here from  $\sigma_\eta(x) = 1 / (1 + \exp(-\eta x))$ .

Derivatives with respect to each parameter of  $\beta$  are:

$$\frac{\partial Q(\beta, \beta^t)}{\partial \mu_{kd}} = \sum_n r_{nk} \left( \frac{x_{nd} - \mu_{kd}}{\sigma_{kd}^2} - \frac{\mathcal{N}(\alpha_{kd}^{(1)}; \mu_{kd}, \sigma_{kd}^2) - \mathcal{N}(\alpha_{kd}^{(2)}; \mu_{kd}, \sigma_{kd}^2)}{F(\alpha_{kd}^{(2)}; \mu_{kd}, \sigma_{kd}^2) - F(\alpha_{kd}^{(1)}; \mu_{kd}, \sigma_{kd}^2)} \right),$$

$$\frac{\partial Q(\beta, \beta^t)}{\partial \sigma_{kd}} = \sum_n r_{nk} \left( \frac{(x_{nd} - \mu_{kd})^2}{\sigma_{kd}^3} - \frac{1}{\sigma_{kd}} - \frac{1}{\sigma_{kd}} \times \frac{\mathcal{N}(\alpha_{kd}^{(1)}; \mu_{kd}, \sigma_{kd}^2) - \mathcal{N}(\alpha_{kd}^{(2)}; \mu_{kd}, \sigma_{kd}^2)}{F(\alpha_{kd}^{(2)}; \mu_{kd}, \sigma_{kd}^2) - F(\alpha_{kd}^{(1)}; \mu_{kd}, \sigma_{kd}^2)} \right),$$

$$\frac{Q(\beta, \beta^t)}{\partial \alpha_{kd}^{(1)}} = \sum_n \eta r_{nk} (1 - \sigma_\eta(x_{nd} - \alpha_{kd}^{(1)})),$$

$$\frac{Q(\beta, \beta^t)}{\partial \alpha_{kd}^{(2)}} = \sum_n -\eta r_{nk} \sigma_\eta(x_{nd} - \alpha_{kd}^{(2)}),$$

where  $d$  is a feature number,  $n$  is a data-instance number,  $k$  is a component number of STru GMA and  $F$  is the cumulative distribution function of the univariate normal distribution.

## B BREAKING THE OVERLAPPING

This section provides details for the heuristic we used to break the overlapping.

Considering two hyper-rectangles  $i$  and  $j$ , the non-overlapping constraint is

$$\max_d \left( \left| \frac{1}{2} (\alpha_{id}^{(1)} + \alpha_{id}^{(2)}) - \frac{1}{2} (\alpha_{jd}^{(1)} + \alpha_{jd}^{(2)}) \right| - \frac{1}{2} (\alpha_{id}^{(2)} - \alpha_{id}^{(1)}) - \frac{1}{2} (\alpha_{jd}^{(2)} - \alpha_{jd}^{(1)}) \right) \geq 0. \quad (1)$$

By looking at the form of the constraint, it can be seen that breaking overlapping can be done on only one particular dimension  $d$ . In cases where the gradient-based updates of parameters violate the constraint in Eq. 1, given a dimension  $d$ , our heuristic considers 4 adaptations:

$$\begin{cases} \text{(i)} \alpha_{id}^{(2)} = \alpha_{jd}^{(1)} & \text{if } \alpha_{jd}^{(1)} > \alpha_{id}^{(1)} \\ \text{(ii)} \alpha_{jd}^{(2)} = \alpha_{id}^{(1)} & \text{otherwise} \end{cases} \quad (2)$$

and

$$\begin{cases} \text{(iii)} \alpha_{jd}^{(1)} = \alpha_{id}^{(2)} & \text{if } \alpha_{jd}^{(2)} > \alpha_{id}^{(2)} \\ \text{(iv)} \alpha_{id}^{(1)} = \alpha_{jd}^{(2)} & \text{otherwise.} \end{cases} \quad (3)$$

Note that (ii) and (iv) are simply alternatives of (i) and (iii) respectively when permuting  $i$  and  $j$ . Furthermore, by applying any of these adaptations, it can be checked that the constraints  $\alpha_i^{(2)} > \alpha_i^{(1)}$  and  $\alpha_j^{(2)} > \alpha_j^{(1)}$  are satisfied.

Table 1: Details of neural network architectures.

| Network  | Architecture                                                                                                                                                       | Datasets                                |
|----------|--------------------------------------------------------------------------------------------------------------------------------------------------------------------|-----------------------------------------|
| Network1 | Dense layer - 128, ELU<br>Dense layer - 128, ELU<br>Dense layer - C, Softmax                                                                                       | Marketing, Credit, Pima, Waveform, Wine |
| Network3 | Dense layer - 40, ELU<br>Dropout - 0.4<br>Dense layer - 25, ELU<br>Dense layer - 10, ELU<br>Dropout - 0.4<br>Dense layer - C, Softmax                              | Magic gamma                             |
| Network2 | Dense layer - 128, ELU<br>Dense layer - 128, ELU<br>Dropout - 0.4<br>Dense layer - 256, ELU<br>Dense layer - 256, ELU<br>Dropout - 0.4<br>Dense layer - C, Softmax | Ionosphere                              |

Figure 1 illustrates adaptations along a particular dimension  $d$ .

As we have 4 adaptations per dimension, therefore, there are  $4D$  choices, where  $D$  is the size of the input space. The best choice is taken as the choice that maximises the expected log-likelihood score. Another interpretation is that it is the choice that minimises the loss in *coverage* of data-instances by STRuGMA.

In summary, with this heuristic, breaking overlapping has the algorithmic complexity  $\mathcal{O}(K^2 \times D)$ , where  $K$  is the number of hyper-rectangles and  $D$  is the number of features.

that gave best results were chosen for each dataset as the black-box.

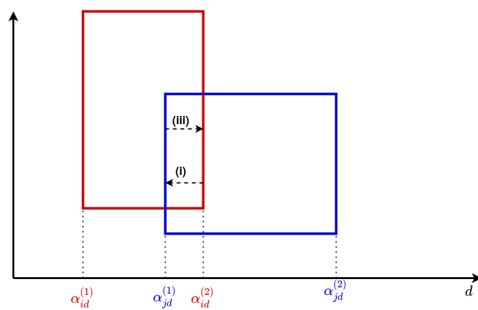

Figure 1: Illustration of adaptations along a particular dimension  $d$ . (i) and (iii) correspond to adaptations described in Eq. 2 and Eq. 3.

## C DETAILS OF NEURAL NETWORK ARCHITECTURES

The three architectures in the table 1 were used in the experiments. Neural networks with different architectures
